# Supplementary material for: ﻿Incongruent molecular and morphological variation in the crab spider Synemaglobosum (Araneae, Thomisidae) in Europe
Source: Zookeys. 2021 Dec 17;1078:107–34. doi: 10.3897/zookeys.1078.64116 (PMC8709837; doi:10.3897/zookeys.1078.64116)
Supplement: Supplementary material 3 — GenBank accession numbers [file zookeys-1078-107-s003.xlsx]

## Sheet: Tabelle1
Specimen voucher	Genbank ID ITS2	Genbank ID CO1 Barcode	CO1 terminal region	GenSeq Nomenclature
NH42	NA	MT234134	MT234072	genseq-4 CO1, ITS2
NH40	MT233946	MT234135	MT234073	genseq-4 CO1, ITS2
NH39	MT233947	MT234133	MT234071	genseq-4 CO1, ITS2
NH38	MT233948	MT234132	MT234070	genseq-4 CO1, ITS2
NH35	MT233949	MT234131	MT234069	genseq-4 CO1, ITS2
NH26	MT233950	MT234130	MT234068	genseq-4 CO1, ITS2
AR9978	NA	MT234129	MT234067	genseq-4 CO1, ITS2
AR9971	MT233951	MT234128	MT234066	genseq-4 CO1, ITS2
AR9895	NA	MT234127	MT234065	genseq-4 CO1, ITS2
AR9894	NA	MT234126	MT234064	genseq-4 CO1, ITS2
AR9892	MT233952	NA	MT234063	genseq-4 CO1, ITS2
AR9851	MT233954	MT234125	MT234061	genseq-4 CO1, ITS2
AR9850	MT233955	MT234124	MT234060	genseq-4 CO1, ITS2
AR9849	MT233956	NA	NA	genseq-4 CO1, ITS2
AR9848	MT233957	MT234123	MT234059	genseq-4 CO1, ITS2
AR9847	MT233958	MT234122	MT234058	genseq-4 CO1, ITS2
AR9846	MT233959	MT234121	MT234057	genseq-4 CO1, ITS2
AR9845	NA	MT234120	MT234056	genseq-4 CO1, ITS2
AR9844	MT233960	MT234119	MT234055	genseq-4 CO1, ITS2
AR9843	NA	MT234118	MT234054	genseq-4 CO1, ITS2
AR9842	NA	MT234117	MT234053	genseq-4 CO1, ITS2
AR9841	MT233961	MT234116	MT234052	genseq-4 CO1, ITS2
AR9840	MT233962	MT234115	MT234051	genseq-4 CO1, ITS2
AR9580	MT233963	MT234114	MT234050	genseq-4 CO1, ITS2
AR9462	MT233964	MT234113	MT234049	genseq-4 CO1, ITS2
AR9461	MT233965	NA	NA	genseq-4 CO1, ITS2
AR9460	MT233966	MT234112	MT234048	genseq-4 CO1, ITS2
AR9459	MT233967	MT234111	MT234047	genseq-4 CO1, ITS2
AR9458	MT233968	MT234110	MT234046	genseq-4 CO1, ITS2
AR9379	MT233969	MT234109	MT234045	genseq-4 CO1, ITS2
AR9378	MT233970	NA	NA	genseq-4 CO1, ITS2
AR9377	MT233971	NA	NA	genseq-4 CO1, ITS2
AR9376	MT233972	NA	NA	genseq-4 CO1, ITS2
AR9374	MT233973	MT234108	MT234044	genseq-4 CO1, ITS2
AR9373	MT233974	MT234107	MT234043	genseq-4 CO1, ITS2
AR9370	MT233975	MT234106	MT234042	genseq-4 CO1, ITS2
AR9369	MT233976	NA	NA	genseq-4 CO1, ITS2
AR9252	MT233977	MT234105	MT234041	genseq-4 CO1, ITS2
AR9251	MT233978	MT234104	MT234040	genseq-4 CO1, ITS2
AR9219	MT233979	MT234102	MT234038	genseq-4 CO1, ITS2
AR9220	MT233980	MT234103	MT234039	genseq-4 CO1, ITS2
AR9218	MT233981	MT234101	MT234037	genseq-4 CO1, ITS2
AR9166	MT233982	MT234100	MT234036	genseq-4 CO1, ITS2
AR9163	MT233983	MT234099	MT234035	genseq-4 CO1, ITS2
AR9162	MT233984	MT234098	MT234034	genseq-4 CO1, ITS2
AR9161	MT233985	MT234097	MT234033	genseq-4 CO1, ITS2
AR9160	MT233986	MT234096	MT234032	genseq-4 CO1, ITS2
AR9159	MT233987	MT234095	MT234031	genseq-4 CO1, ITS2
AR9158	MT233988	MT234094	MT234030	genseq-4 CO1, ITS2
AR9154	MT233989	MT234093	MT234029	genseq-4 CO1, ITS2
AR9153	MT233990	MT234092	MT234028	genseq-4 CO1, ITS2
AR9152	MT233991	NA	MT234027	genseq-4 CO1, ITS2
AR9151	MT233992	MT234091	MT234026	genseq-4 CO1, ITS2
AR9147	MT233993	MT234090	MT234025	genseq-4 CO1, ITS2
AR9146	MT233994	MT234089	MT234024	genseq-4 CO1, ITS2
AR11083	NA	MT234088	NA	genseq-4 CO1, ITS2
AR10787	MT233995	MT234087	MT234023	genseq-4 CO1, ITS2
AR10769	MT233996	MT234086	MT234022	genseq-4 CO1, ITS2
AR10755	MT233997	MT234085	MT234021	genseq-4 CO1, ITS2
AR10743	MT233998	MT234084	MT234020	genseq-4 CO1, ITS2
AR10729	MT233999	MT234083	MT234019	genseq-4 CO1, ITS2
AR10728	MT234000	MT234082	MT234018	genseq-4 CO1, ITS2
AR10676	MT234001	MT234081	MT234017	genseq-4 CO1, ITS2
AR10649	MT234002	MT234080	MT234016	genseq-4 CO1, ITS2
AR10648	MT234003	MT234079	MT234015	genseq-4 CO1, ITS2
AR10121	MT234004	MT234078	MT234014	genseq-4 CO1, ITS2
AR10120	MT234005	MT234077	MT234013	genseq-4 CO1, ITS2
AR10119	MT234006	MT234076	MT234012	genseq-4 CO1, ITS2
AR10118	MT234007	MT234075	MT234011	genseq-4 CO1, ITS2
AR10117	MT234008	MT234074	MT234010	genseq-4 CO1, ITS2
AR10116	MT234009	NA	NA	genseq-4 CO1, ITS2
